# Supplementary material
Source: publisher figshare collection journal article supplement (https://diabetesjournals.figshare.com/ndownloader/files/26711882)
Supplement: Supplementary file 1 [file 26711882]

## **Supplemental Material**

**Supplementary Table 1.** The numbers/proportions of type 2 diabetes diagnosed by fasting plasma glucose, treatment with hypoglycemic drugs, and self-reported previous diagnosis.

**Supplementary Table 2.** Number of missed visits of the participants.

**Supplementary Table 3.** Average hazard ratios (95% confidence interval) for incident cardiovascular disease and all-cause mortality among patients with new-onset type 2 diabetes versus controls, across age groups: **Sensitivity analysis excluding outcome events within the first year of follow-up (N = 21,276).**

**Supplementary Table 4.** Average hazard ratios (95% confidence interval) for incident cardiovascular disease and all-cause mortality among patients with new-onset type 2 diabetes versus controls, across age groups: **Sensitivity analysis excluding participants who were diagnosed with diabetes via treatment with hypoglycemic drugs. (N=16,086).**

**Supplementary Table 5.** Competing risk analyses of cardiovascular disease among patients with non-onset type 2 diabetes versus controls, across age groups.

**Supplementary Fig. 1.** The cumulative incidence of CVD, stroke and all-cause mortality among participants with new-onset type 2 diabetes versus controls across onset age groups.

**Supplementary Fig. 2.** Cause-specific mortality among new-onset type 2 diabetes and corresponding matched controls across age groups

**Supplementary Table 1.** The numbers/proportions of type 2 diabetes diagnosed by fasting plasma glucose, treatment with hypoglycemic drugs, and self-reported previous diagnosis.

| <b>Diagnostic criteria for type 2 diabetes</b>                                    | <b>N (%)</b>  |
|-----------------------------------------------------------------------------------|---------------|
| Fasting plasma glucose $\geq$ 7.0 mmol/L                                          | 9864 (91.5)   |
| Treatment with hypoglycemic drugs                                                 | 1145 (10.6)   |
| self-reported previous diagnosis                                                  | 1346 (12.5)   |
| Fasting plasma glucose $\geq$ 7.0 mmol/L or/and treatment with hypoglycemic drugs | 10459 (97.1)  |
| Total type 2 diabetes                                                             | 10777 (100.0) |

**Supplementary Table 2.** Number of missed visits of the participants.

| <b>Number of missed visits</b> | <b>N (%)</b> |
|--------------------------------|--------------|
| 1                              | 3547(11.09)  |
| 2                              | 922(2.89)    |
| 3                              | 284(0.89)    |

**Supplementary Table 3.** Average hazard ratios (95% confidence interval) for incident cardiovascular disease and all-cause mortality among patients with new-onset type 2 diabetes versus controls, across age groups: **Sensitivity analysis excluding outcome events within the first year of follow-up (N = 21,276).**

| Type 2 diabetes onset age | CVD         |                  | All-cause mortality |                   | Stroke      |                  |
|---------------------------|-------------|------------------|---------------------|-------------------|-------------|------------------|
|                           | Event/Total | AHR (95%CI)      | Event/Total         | AHR (95%CI)       | Event/Total | AHR (95%CI)      |
| < 45 Y                    | 34/3052     | 2.56 (1.06-6.14) | 28/3052             | 5.65 (1.99-16.04) | 28/3052     | 2.34 (1.00-6.13) |
| 45-54 Y                   | 230/6926    | 1.82 (1.26-2.63) | 141/6926            | 2.94 (1.94-4.46)  | 173/6926    | 1.81 (1.18-2.80) |
| 55-64 Y                   | 292/7572    | 1.22 (0.86-1.60) | 176/7572            | 1.81 (1.18-2.72)  | 233/7572    | 1.13 (0.80-1.62) |
| ≥ 65 Y                    | 220/3726    | 1.17 (0.76-1.96) | 388/3726            | 1.79 (1.42-2.31)  | 190/3726    | 1.20 (0.72-2.01) |

Data are presented as average hazard ratio (95% confidence interval). All models were adjusted for smoke status, drink status, hypertension, LDL-C, HDL-C, obesity, eGFR, and physical exercise.

**Supplementary Table 4.** Average hazard ratios (95% confidence interval) for incident cardiovascular disease and all-cause mortality among patients with new-onset type 2 diabetes versus controls, across age groups: **Sensitivity analysis excluding participants who were diagnosed with diabetes via treatment with hypoglycemic drugs.** (N=16,086).

| Type 2 diabetes onset age | CVD         |                   | All-cause mortality |                   | Stroke      |                   |
|---------------------------|-------------|-------------------|---------------------|-------------------|-------------|-------------------|
|                           | Event/Total | AHR (95%CI)       | Event/Total         | AHR (95%CI)       | Event/Total | AHR (95%CI)       |
| < 45 Y                    | 22/2438     | 3.33 (1.02-11.61) | 28/2438             | 7.22 (2.68-25.23) | 19/2438     | 3.75 (0.91-15.38) |
| 45-54 Y                   | 189/5360    | 1.51 (1.01-2.27)  | 132/5360            | 3.78 (2.38-6.01)  | 142/5360    | 1.43 (0.90-2.28)  |
| 55-64 Y                   | 216/5446    | 1.10 (0.75-1.62)  | 155/5446            | 1.65 (1.08-2.54)  | 174/5446    | 1.03 (0.67-1.57)  |
| ≥ 65 Y                    | 193/2842    | 1.00 (0.63-1.58)  | 359/2842            | 1.61 (1.26-2.06)  | 165/2842    | 0.90 (0.54-1.48)  |

Data are presented as average hazard ratio (95% confidence interval). All models were adjusted for smoke status, drink status, hypertension, LDL-C, HDL-C, obesity, eGFR, and physical exercise.

**Supplementary Table 5.** Competing risk analyses of cardiovascular disease among patients with new-onset type 2 diabetes versus controls, across age groups.

| <b>Type 2 diabetes onset age</b> | <b>Event/Total</b> | <b>Sub-distribution<br/>Hazard Ratio (95%CI)</b> |
|----------------------------------|--------------------|--------------------------------------------------|
| <b>CVD</b>                       |                    |                                                  |
| < 45 Y                           | 33/3060            | 3.22 (1.33-7.82)                                 |
| 45-54Y                           | 266/6994           | 1.60 (1.23-2.08)                                 |
| 55-64Y                           | 356/7680           | 1.26 (1.00-1.64)                                 |
| ≥ 65Y                            | 252/3820           | 1.17 (0.94-1.45)                                 |
| <b>Stroke</b>                    |                    |                                                  |
| < 45Y                            | 27/3060            | 3.11 (1.19-8.17)                                 |
| 45-54Y                           | 201/6994           | 1.70 (1.25-2.31)                                 |
| 55-64Y                           | 278/7680           | 1.19 (0.97-1.52)                                 |
| ≥ 65Y                            | 219/3820           | 1.16 (0.88-1.54)                                 |

Data are presented as hazard ratio (95% confidence interval). All models were adjusted for smoke status, drink status, hypertension, LDL-C, HDL-C, obesity, eGFR, and physical exercise.

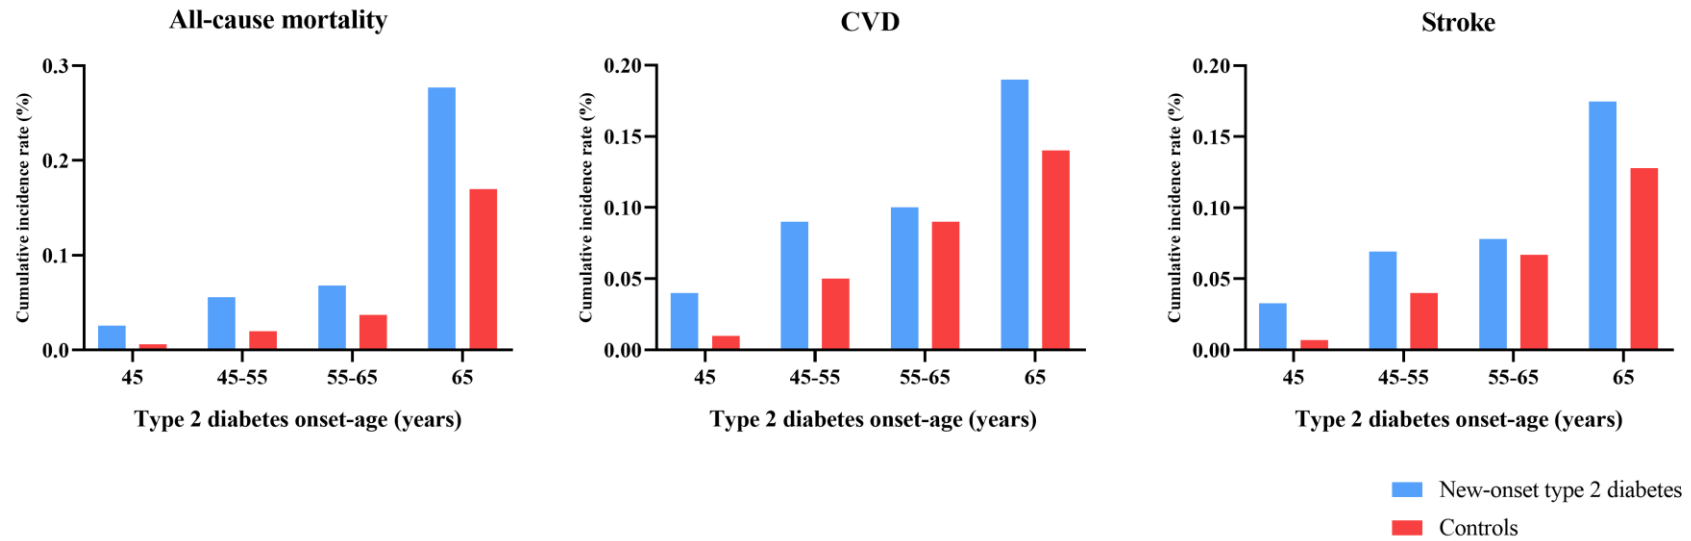

**Supplementary Figure 1.** The cumulative incidence of CVD, stroke and all-cause mortality among participants with new-onset type 2 diabetes versus controls across onset age groups.

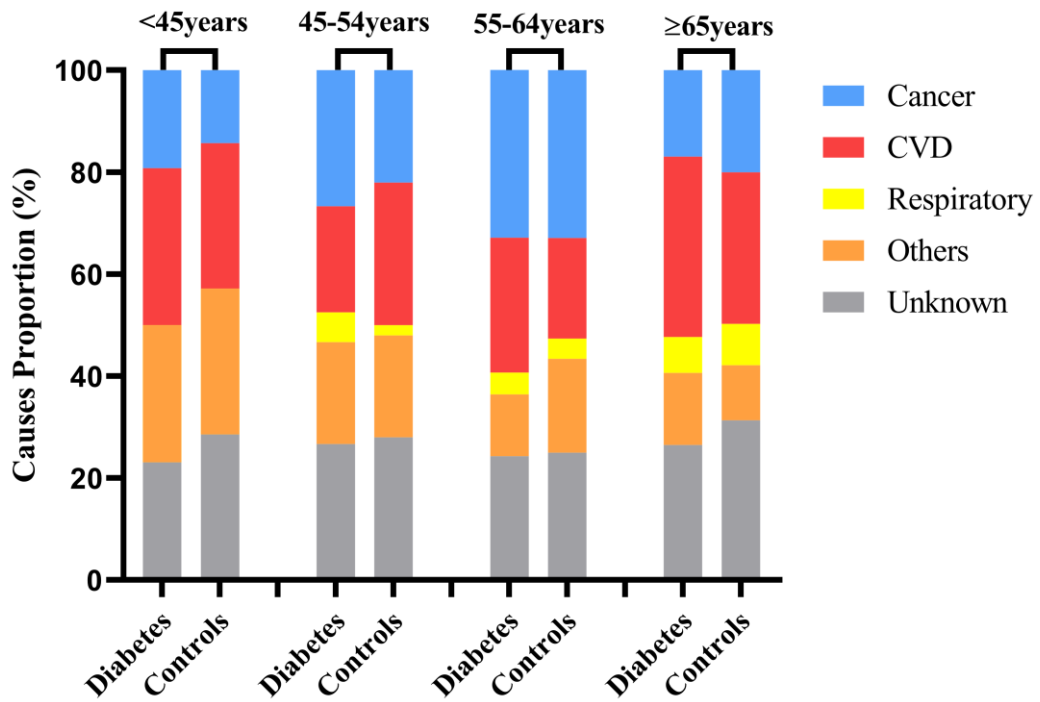

**Supplementary Figure 2.** Cause-specific mortality among new-onset type 2 diabetes mellitus and corresponding matched controls across age groups
